# Supplementary material for: Efficient SIVcpz replication in human lymphoid tissue requires viral matrix protein adaptation
Source: JCI journal article supplement (doi:10.1172/jci61429), 2012-04-16
Supplement: sd1 [file 1]

301 Moved Permanently

# Moved Permanently

The document has moved here.
